# Supplementary material
Source: publisher figshare collection journal article supplement (https://gsajournals.figshare.com/articles/dataset/_/15127761)
Supplement: Supplementary file [file 1]

## Figure Genotypes

### DUAL Control genotypes

*DC<sup>NA</sup>*

*hs-flp* / + ; *hs-p65* / + ; *salm-LexADBBD* , *DVE>>GAL4* / +

*DC<sup>GluR1</sup>*

*hs-flp* / + ; *lexAop-GluR1<sup>LC</sup>* , *hs-p65* / + ; *salm-LexADBBD* , *DVE>>GAL4* / +

*DC<sup>GluR1;NoGAL4</sup>*

*hs-flp* / + ; *lexAop-GluR1<sup>LC</sup>* , *hs-p65* / + ; *salm-LexADBBD* / +

*DC<sup>rpr</sup>*

*hs-flp* / + ; *lexAop-rpr* , *hs-p65* / + ; *salm-LexADBBD* , *DVE>>GAL4* / +

*DC<sup>hepCA</sup>*

*hs-flp* / + ; *lexAop-hepCA* , *hs-p65* / + ; *salm-LexADBBD* , *DVE>>GAL4* / +

### Figure 1

(C, H, I) *hs-flp* / + ; *hs-p65* / + ; *salm-LexADBBD* , *DVE>>GAL4* / *UAS-y<sup>RNAi</sup>*

(D, H, I) *hs-flp* / + ; *lexAop-GluR1<sup>LC</sup>* , *hs-p65* / + ; *salm-LexADBBD* , *DVE>>GAL4* / *UAS-y<sup>RNAi</sup>*

(E, H, I) *hs-flp* / + ; *lexAop-rpr* , *hs-p65* / + ; *salm-LexADBBD* , *DVE>>GAL4* / *UAS-y<sup>RNAi</sup>*

(F, H, I) *hs-flp* / + ; *lexAop-hepCA* , *hs-p65* / + ; *salm-LexADBBD* , *DVE>>GAL4* / *UAS-y<sup>RNAi</sup>*

### Figure 2

(A, D, K) *hs-flp* / + ; *lexAop-GluR1<sup>LC</sup>* , *hs-p65* / + ; *salm-LexADBBD* , *DVE>>GAL4* / *UAS-y<sup>RNAi</sup>*

(B, F) *hs-flp* / + ; *lexAop-hepCA* , *hs-p65* / + ; *salm-LexADBBD* , *DVE>>GAL4* / *UAS-y<sup>RNAi</sup>*

(C) *hs-flp* / + ; *hs-p65* / + ; *salm-LexADBBD* , *DVE>>GAL4* / *UAS-y<sup>RNAi</sup>*

(E, L) *hs-flp* / + ; *lexAop-rpr* , *hs-p65* / + ; *salm-LexADBBD* , *DVE>>GAL4* / *UAS-y<sup>RNAi</sup>*

(G-H) *hs-flp* / + ; *lexAop-GluR1<sup>LC</sup>* , *hs-p65* / *lexAop-GFP* ; *salm-LexADBBD* , *DVE>>GAL4* / *UAS-RFP*

(I-J) *hs-flp* / + ; *lexAop-hepCA* , *hs-p65* / *lexAop-GFP* ; *salm-LexADBBD* , *DVE>>GAL4* / *UAS-RFP*

### Figure 3

(A, D, I, K', M) *hs-flp* / + ; *lexAop-rpr* , *hs-p65* / + ; *salm-LexADBBD* , *DVE>>GAL4* / *UAS-p35*

(B, F, G, H, J, L', M) *hs-flp* / + ; *lexAop-GluR1<sup>LC</sup>* , *hs-p65* / + ; *salm-LexADBBD* , *DVE>>GAL4* / *UAS-p35*

(C, I, K, M) *hs-flp* / + ; *lexAop-rpr* , *hs-p65* / + ; *salm-LexADBBD* , *DVE>>GAL4* / *UAS-y<sup>RNAi</sup>*

(E, J, L, M) *hs-flp* / + ; *lexAop-GluR1<sup>LC</sup>* , *hs-p65* / + ; *salm-LexADBBD* , *DVE>>GAL4* / *UAS-y<sup>RNAi</sup>*

### Figure 4

(A-F) *hs-flp* / + ; *lexAop-GluR1<sup>LC</sup>* , *hs-p65* / *DR<sup>WNT</sup>-GFP* ; *salm-LexADBBD* , *DVE>>GAL4* / +

(G) *hs-flp* / + ; *lexAop-GluR1<sup>LC</sup>* , *hs-p65* / + ; *salm-LexADBBD* , *DVE>>GAL4* / *UAS-y<sup>RNAi</sup>*

### Figure 5

- (A) *hs-flp* / + ; *lexAop-GluR1<sup>LC</sup>* , *hs-p65* / AP-1-GFP ; *salm-LexADBBD* , DVE>>GAL4 / +  
(B) *hs-flp* / + ; *lexAop-GluR1<sup>LC</sup>* , *hs-p65* / + ; *salm-LexADBBD* , DVE>>GAL4 / *puc<sup>A251</sup>*  
(C-D) *hs-flp* / + ; *lexAop-GluR1<sup>LC</sup>* , *hs-p65* / + ; *salm-LexADBBD* , DVE>>GAL4 / UAS-*y<sup>RNAi</sup>*  
(E) *hs-flp* / + ; *lexAop-GluR1<sup>LC</sup>* , *hs-p65* / + ; *salm-LexADBBD* , DVE>>GAL4 / UAS-*hep<sup>RNAi</sup>*  
(F) *hs-flp* / + ; *lexAop-GluR1<sup>LC</sup>* , *hs-p65* / + ; *salm-LexADBBD* , DVE>>GAL4 / UAS-*bsk<sup>DN</sup>*  
(G) *hs-flp* / + ; *lexAop-GluR1<sup>LC</sup>* , *hs-p65* / + ; *salm-LexADBBD* , DVE>>GAL4 / UAS-*mkk4<sup>RNAi</sup>*  
(H) *hs-flp* / + ; *lexAop-GluR1<sup>LC</sup>* , *hs-p65* / UAS-miRHG ; *salm-LexADBBD* , DVE>>GAL4 / +

### Figure 6

- (A, B) *hs-flp* / + ; *lexAop-GluR1<sup>LC</sup>* , *hs-p65* / + ; *salm-LexADBBD* , DVE>>GAL4 / PCNA-GFP  
(C) *hs-flp* / + ; *lexAop-GluR1<sup>LC</sup>* , *hs-p65* / UAS-miRHG ; *salm-LexADBBD* , DVE>>GAL4 / PCNA-GFP  
(D, F, G) *hs-flp* / + ; *lexAop-GluR1<sup>LC</sup>* / UAS-miRHG ; *salm-LexADBBD* , DVE>>GAL4 / *DR<sup>WNT</sup>-GAL80*  
(E, G) *hs-flp* / + ; *lexAop-rpr* , *hs-p65* / + ; *salm-LexADBBD* , DVE>>GAL4 / UAS-*y<sup>RNAi</sup>*  
*hs-flp* / + ; *lexAop-rpr* , *hs-p65* / UAS-miRHG ; *salm-LexADBBD* , DVE>>GAL4 / +  
(F, G) *hs-flp* / + ; *lexAop-GluR1<sup>LC</sup>* , *hs-p65* / + ; *salm-LexADBBD* , DVE>>GAL4 / UAS-*y<sup>RNAi</sup>*  
*hs-flp* / + ; *lexAop-GluR1<sup>LC</sup>* , *hs-p65* / UAS-miRHG ; *salm-LexADBBD* , DVE>>GAL4 / +

### Supplemental Figures

#### Figure S1

- (B) *hs-flp* / + ; *hs-p65* / *lexAop-GFP* ; *salm-LexADBBD* , DVE>>GAL4 / UAS-RFP  
(C) *hs-flp* / + ; *lexAop-GluR1<sup>LC</sup>* , *hs-p65* / + ; *salm-LexADBBD* , DVE>>GAL4 / +  
(D) *hs-flp* / + ; *hs-p65* / + ; *salm-LexADBBD* , DVE>>GAL4 / +  
(E) *hs-flp* / + ; *lexAop-GluR1<sup>LC</sup>* / + ; *salm-LexADBBD* , DVE>>GAL4 / +  
(F) *hs-flp* / + ; *lexAop-GluR1<sup>LC</sup>* , *hs-p65* / + ; DVE>>GAL4 / +

#### Figure S2

- (A, C) *hs-flp* / + ; *lexAop-GluR1<sup>LC</sup>* , *hs-p65* / *lexAop-GFP* ; *salm-LexADBBD* , DVE>>GAL4 / +  
(B, C) *hs-flp* / + ; *lexAop-hepCA* , *hs-p65* / *lexAop-GFP* ; *salm-LexADBBD* , DVE>>GAL4 / +  
(D, F) *hs-flp* / + ; *lexAop-GluR1<sup>LC</sup>* , *hs-p65* / *DR<sup>WNT</sup>-GFP* ; *salm-LexADBBD* , DVE>>GAL4 / UAS-mCherry  
(E, F) *hs-flp* / + ; *lexAop-hepCA* , *hs-p65* / *DR<sup>WNT</sup>-GFP* ; *salm-LexADBBD* , DVE>>GAL4 / UAS-mCherry

#### Figure S3

(A, C) *hs-flp* / + ; *lexAop-rpr* , *hs-p65* / + ; *R85E08-DBD* , *DVE>>GAL4* / *UAS-p35*  
 (B, C, F, I) *hs-flp* / + ; *lexAop-GluR1<sup>LC</sup>* , *hs-p65* / + ; *R85E08-DBD* , *DVE>>GAL4* / *UAS-p35*  
 (C, E) *hs-flp* / + ; *lexAop-hepCA* , *hs-p65* / + ; *salm-LexADBD* , *DVE>>GAL4* / *UAS-p35*  
 (C, L) *hs-flp* / + ; *lexAop-GluR1<sup>LC</sup>* , *hs-p65* / *UAS-p35* ; *salm-LexADBD* , *DVE>>GAL4* / *DR<sup>WNT</sup>-GAL80*  
 (D) *hs-flp* / + ; *lexAop-hepCA* , *hs-p65* / + ; *salm-LexADBD* , *DVE>>GAL4* / *UAS-y<sup>RNAi</sup>*  
 (G, I) *hs-flp* / + ; *lexAop-GluR1<sup>LC</sup>* / + ; *salm-LexADBD* , *DVE>>GAL4* / *UAS-wg<sup>RNAi</sup>*  
 (H, I) *hs-flp* / + ; *lexAop-GluR1<sup>LC</sup>* / *UAS-p35* ; *salm-LexADBD* , *DVE>>GAL4* / *UAS-wg<sup>RNAi</sup>*  
 (K) *hs-flp* / + ; *lexAop-GluR1<sup>LC</sup>* , *hs-p65* / *UAS-GFP* ; *salm-LexADBD* , *DVE>>GAL4* / *DR<sup>WNT</sup>-GAL80*

#### Figure S4

(A) *hep<sup>r75</sup>* / Y ; *lexAop-GluR1<sup>LC</sup>* , *hs-p65* / + ; *salm-LexADBD* , *DVE>>GAL4* / +  
 (B) *hs-flp* / + ; *lexAop-GluR1<sup>LC</sup>* , *hs-p65* / + ; *salm-LexADBD* , *DVE>>GAL4* / *UAS-bsk<sup>RNAi</sup>*  
 (C) *hs-flp* / + ; *lexAop-GluR1<sup>LC</sup>* , *hs-p65* / + ; *salm-LexADBD* , *DVE>>GAL4* / *UAS-egr<sup>RNAi</sup>*  
 (D) *hs-flp* / + ; *lexAop-GluR1<sup>LC</sup>* , *hs-p65* / + ; *salm-LexADBD* , *DVE>>GAL4* / *UAS-grnd<sup>RNAi</sup>*  
 (E) *hs-flp* / + ; *lexAop-GluR1<sup>LC</sup>* , *hs-p65* / + ; *salm-LexADBD* , *DVE>>GAL4* / *UAS-rpr<sup>RNAi</sup>*  
 (F) *hs-flp* / + ; *lexAop-GluR1<sup>LC</sup>* , *hs-p65* / + ; *salm-LexADBD* , *DVE>>GAL4* / *hid<sup>1</sup>*  
 (G) *hs-flp* / + ; *lexAop-GluR1<sup>LC</sup>* , *hs-p65* / *UAS-miRHG* ; *salm-LexADBD* , *DVE>>GAL4* / +  
 (I, J) *hs-flp* / + ; *lexAop-GluR1<sup>LC</sup>* , *hs-p65* / *UAS-GFP* ; *salm-LexADBD* / *egr-GAL4*

#### Figure S5

(A, B) *hs-flp* / + ; *lexAop-GluR1<sup>LC</sup>* , *hs-p65* / + ; *salm-LexADBD* , *DVE>>GAL4* / *CycE-disc-GFP*  
 (C, D, E) *hs-flp* / + ; *lexAop-GluR1<sup>LC</sup>* , *hs-p65* / + ; *salm-LexADBD* , *DVE>>GAL4* / *UAS-y<sup>RNAi</sup>*  
 (E) *hs-flp* / + ; *hs-p65* / + ; *salm-LexADBD* , *DVE>>GAL4* / *UAS-yRNAi*  
*hs-flp* / + ; *hs-p65* / *UAS-miRHG* ; *salm-LexADBD* , *DVE>>Gal4* / +  
*hs-flp* / + ; *lexAop-GluR1<sup>LC</sup>* , *hs-p65* / *UAS-miRHG* ; *salm-LexADBD* , *DVE>>GAL4* / +  
 (F, G, H) *hs-flp* / + ; *lexAop-GluR1<sup>LC</sup>* , *hs-p65* / + ; *salm-LexADBD* , *DVE>>GAL4* / *PCNA-GFP*  
 (H) *hs-flp* / + ; *lexAop-GluR1<sup>LC</sup>* , *hs-p65* / *UAS-miRHG* ; *salm-LexADBD* , *DVE>>GAL4* / *PCNA-GFP*
